# Supplementary material
Source: PubMed Central journal article supplement (PMC2947865)
Supplement: 1006025107_pnas.201006025SI.pdf [file 1006025107_pnas.201006025SI.pdf]

# Supporting Information

Raznahan et al. 10.1073/pnas.1006025107

## SI Text 1: Advantageous Properties of Cortical Thickness as an Anatomical Metric

Cortical thickness is an informative metric of cortical anatomy that has shown sex differences in existing postmortem and cross-sectional neuroimaging studies of humans (1) and is known to be a sensitive in vivo index of both typical (2, 3) and atypical cortical development (4). Furthermore, unlike the principal alternative spatially nonbiased measure of cortical anatomy—voxel-based measures of “gray matter density”—vertex-based measures of cortical thickness do not conflate cortical thickness and cortical surface area. This property is an important advantage, because cortical thickness and surface area capture very different sets of biological processes, as evidenced by their differing evolutionary histories (5), developmental trajectories (6, 7), and genetic determinants (8, 9).

## SI Text 2: Methodological Details

**Genotyping.** For each participant, DNA was extracted from previously prepared lymphoblastoid cell lines using standard methods (Qiagen). Lymphoblastoid cell lines were grown in culture for approximately 2 mo before DNA extraction. Genotyping of AR-CAG length was performed by Prevention Genetics, using a

slightly modified Marshfield set (13) (<http://research.marshfieldclinic.org/genetics/GeneticResearch/sets/Set%2013.xls>). This screening set is comprised of 405 STRPs that cover the autosomal, X, and Y chromosomes at a density of ~10 cM. PCR was performed in 96-well plates in 6- $\mu$ L reactions containing ~45 ng DNA, 0.075  $\mu$ M forward (5'-ACCGAGGAGCTTTCCAGAAT-3') and reverse (5'-AGAACCATCCTCACCTGCT-3') primers, 0.03 U Platinum Taq, 100  $\mu$ M each dNTP, and 1.5 mM MgCl<sub>2</sub>. All markers were multiplexed at the PCR stage. Multiplexes were put together based on nonoverlapping marker size ranges and/or unique fluorescent dyes. PCR reactions were incubated for 2 min at 95 °C, followed by 27 cycles of denaturation (95 °C for 40 s), annealing (55 °C for 75 s), and elongation (72 °C for 40 s). A final extension (72 °C for 6 min) completed the PCR profile. PCR products were run on a polyacrylamide gel, and product length was determined in comparison to a standard DNA ladder. DNA sequencing of positive controls and correlation analyses of CAG length call for duplicate samples were conducted to ensure reliability and accuracy of genotype assignment. The distribution of CAG repeats was similar to that reported by available reference data (13), with 90% of AR alleles having between 19 and 28 CAG repeats.

1. Lenroot RK, Giedd JN (2010) Sex differences in the adolescent brain. *Brain Cogn* 72:46–55.
2. Shaw P, et al. (2008) Neurodevelopmental trajectories of the human cerebral cortex. *J Neurosci* 28:3586–3594.
3. Gogtay N, et al. (2004) Dynamic mapping of human cortical development during childhood through early adulthood. *Proc Natl Acad Sci USA* 101:8174–8179.
4. Giedd JN, et al. (2008) Trajectories of anatomic brain development as a phenotype. *Novartis Found Symp* 289:101–112.
5. Rakic P (1995) A small step for the cell, a giant leap for mankind: A hypothesis of neocortical expansion during evolution. *Trends Neurosci* 18:383–388.
6. Armstrong E, Schleicher A, Omran H, Curtis M, Zilles K (1995) The ontogeny of human gyrification. *Cereb Cortex* 5:56–63.
7. Sowell ER, et al. (2007) Sex differences in cortical thickness mapped in 176 healthy individuals between 7 and 87 years of age. *Cereb Cortex* 17:1550–1560.
8. Panizzoni CF-N, et al. (2007) Distinct genetic influence on cortical surface area and cortical thickness. *Cereb Cortex*, in press.
9. Winkler AM, et al. (2009) Cortical thickness or grey matter volume? The importance of selecting the phenotype for imaging genetics studies. *Neuroimage*, in press.
10. Zijdenbos AP, Forghani R, Evans AC (2002) Automatic “pipeline” analysis of 3-D MRI data for clinical trials: Application to multiple sclerosis. *IEEE Trans Med Imaging* 21:1280–1291.
11. MacDonald D, Kabani N, Avis D, Evans AC (2000) Automated 3-D extraction of inner and outer surfaces of cerebral cortex from MRI. *Neuroimage* 12:340–356.
12. Lerch JP, Evans AC (2005) Cortical thickness analysis examined through power analysis and a population simulation. *Neuroimage* 24:163–173.
13. Buchanan G, et al. (2004) Structural and functional consequences of glutamine tract variation in the androgen receptor. *Hum Mol Genet* 13:1677–1692.

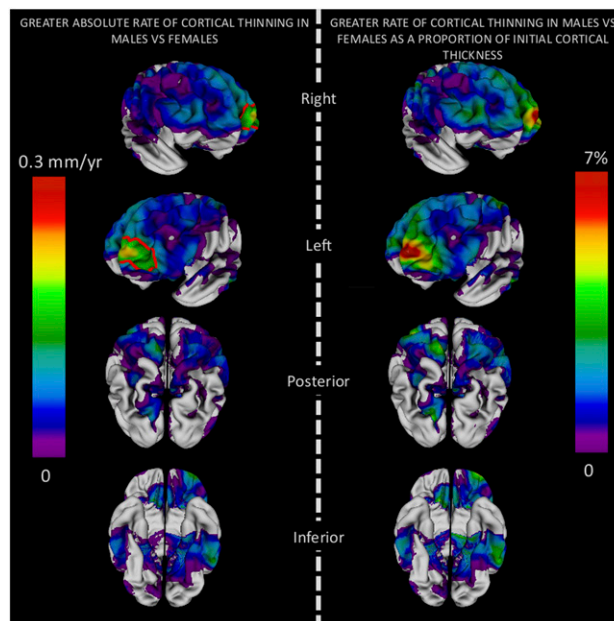

**Fig. S1.** Maps of difference in absolute (*Left*) and proportional (*Right*) rate of cortical thickness loss between ages 9 and 22 y in male and female subjects. (*Left*) Map of absolute difference between estimated mean rate of cortical thickness change in male subjects and estimated mean rate of cortical thickness change in female subjects (ie, coefficient magnitude for the age-by-sex interaction term in predicting cortical thickness). Colored vertices are those where cortical thickness loss is faster in male than female subjects. “Warmer” colors denote a greater acceleration of cortical thinning in males relative to females. The red “isobar” encompasses regions where the  $t$  statistic associated with this age-by-sex interaction term was statistically significant ( $P < 0.05$ ). (*Right*) Map of percentage difference between rate of cortical thickness loss between ages 9 and 22 y in male compared with female subjects, where rate of cortical thickness loss in each sex is expressed as a proportion of initial cortical thickness at age 9 y. The equivalence of absolute and proportional maps indicates that sex differences in the rate of cortical thickness loss during adolescence are not explained by the fact that males have thicker cortices to begin with. Therefore, our findings regarding sex differences in the rate of cortical thickness loss hold regardless of any effect sex differences in overall brain size may have on sex differences in cortical thickness.

**Table S1.** Basis for nomination of cortical regions where distinct patterns of sexually dimorphic cortical maturation were hypothesized to exist

| Domain of cognitive-behavioral sex difference | Evidence for sex difference | Cortical regions sub-serving cognitive-behavioral domain | Evidence for nomination of cortical regions | Evidence for regional structural and functional cortical sex differences |
|-----------------------------------------------|-----------------------------|----------------------------------------------------------|---------------------------------------------|--------------------------------------------------------------------------|
| Language                                      | Refs. 1, 2                  | TempPole, STS, transverse temporal sulcus, IFG, SMG      | Refs. 3, 4                                  | Refs. 5, 6                                                               |
| Visuospatial                                  | Refs. 7, 8                  | SFG, MFG, IFG, PostCG, PreCG, SPL, IPS, IPL, ITG         | Ref. 9                                      | Refs. 10, 11                                                             |
| Social cognition                              | Refs. 12, 13                | SFG, MFG, MedFG, OFC, AntCC, IFG, STS, vIPFC, vmPFC      | Refs. 14                                    | Refs. 15–18                                                              |
| Sensation seeking                             | Refs. 19, 20                | MedFG, AntCC, IFG, insula                                | Refs. 21, 22                                | Ref. 23                                                                  |
| Hyperactivity/impulsivity                     | Ref. 24                     | AntCC, DLPFC, vmPFC, OFC                                 | Refs. 25–29                                 | Ref. 30                                                                  |
| Reward-related behaviors                      | Ref. 31                     | avPFC, vIPFC                                             | Ref. 32                                     | Ref. 33                                                                  |
| Aggression                                    | Ref. 34                     | FPC, vmPFC, dmPFC, AntCC                                 | Refs. 27, 35, 36                            | –                                                                        |

avPFC, anteriorventral prefrontal cortex; dmPFC, dorsomedial prefrontal cortex; FPC, frontopolar cortex; ITG, inferior temporal gyrus; MedFG, medial frontal gyrus; PostCG, post central gyrus; PreCG, pre central gyrus; SPL, superior parietal lobule; TempPole, temporal pole. For each principle domain of cognitive-behavioral sex difference (first column), references providing details of how male and female subjects differ at the cognitive behavioral level. Then, the set of cortical regions most consistently linked to each cognitive behavioral domain is listed, alongside references justifying the composition of each list.

1. Dionne G, Dale PS, Boivin M, Plomin R (2003) Genetic evidence for bidirectional effects of early lexical and grammatical development. *Child Dev* 74:394–412.
2. Stokes SF, Klee T (2009) Factors that influence vocabulary development in two-year-old children. *J Child Psychol Psychiatry* 50:498–505.
3. Richardson FM, Price CJ (2009) Structural MRI studies of language function in the undamaged brain. *Brain Struct Funct* 213:511–523.
4. Price CJ (2000) The anatomy of language: contributions from functional neuroimaging. *J Anat* 197:335–359.
5. Plante E, Schmithorst VJ, Holland SK, Byars AW (2006) Sex differences in the activation of language cortex during childhood. *Neuropsychologia* 44:1210–1221.
6. Burman DD, Bitan T, Booth JR (2008) Sex differences in neural processing of language among children. *Neuropsychologia* 46:1349–1362.
7. Voyer D, Voyer S, Bryden MP (1995) Magnitude of sex differences in spatial abilities: a meta-analysis and consideration of critical variables. *Psychol Bull* 117:250–270.
8. Lippa RA, Collaer ML, Peters M (2009) Sex differences in mental rotation and line angle judgments are positively associated with gender equality and economic development across 53 nations. *Arch Sex Behav* 39:990–997.
9. Zacks JM (2008) Neuroimaging studies of mental rotation: A meta-analysis and review. *J Cogn Neurosci* 20:1–19.
10. Christova PS, Lewis SM, Tagaris GA, Uğurbil K, Georgopoulos AP (2008) A voxel-by-voxel parametric fMRI study of motor mental rotation: Hemispheric specialization and gender differences in neural processing efficiency. *Exp Brain Res* 189:79–90.
11. Jordan K, Wüstenberg T, Heinze HJ, Peters M, Jäncke L (2002) Women and men exhibit different cortical activation patterns during mental rotation tasks. *Neuropsychologia* 40:2397–2408.
12. Williams LM, et al. (2009) Explicit identification and implicit recognition of facial emotions: I. Age effects in males and females across 10 decades. *J Clin Exp Neuropsychol* 31:257–277.
13. McEwen F, et al. (2007) Origins of individual differences in imitation: Links with language, pretend play, and socially insightful behavior in two-year-old twins. *Child Dev* 78:474–492.
14. Lieberman MD (2007) Social cognitive neuroscience: A review of core processes. *Annu Rev Psychol* 58:259–289.
15. Krach S, et al. (2009) Are women better mindreaders? Sex differences in neural correlates of mentalizing detected with functional MRI. *BMC Neurosci* 10:9.
16. McClure EB, et al. (2004) A developmental examination of gender differences in brain engagement during evaluation of threat. *Biol Psychiatry* 55:1047–1055.
17. Platek S, Keenan JP, Mohamed FB (2005) Sex differences in the neural correlates of child facial resemblance: An event related fMRI study. *Neuroimage* 25:1336–1344.
18. Schulte-Rüther M, Markowitsch HJ, Shah NJ, Fink GR, Piefke M (2008) Gender differences in brain networks supporting empathy. *Neuroimage* 42:393–403.
19. Steinberg L, et al. (2008) Age differences in sensation seeking and impulsivity as indexed by behavior and self-report: Evidence for a dual systems model. *Dev Psychol* 44:1764–1778.
20. Martin CA, et al. (2002) Sensation seeking, puberty, and nicotine, alcohol, and marijuana use in adolescence. *J Am Acad Child Adolesc Psychiatry* 41:1495–1502.
21. Strüber D, Lück M, Roth G (2008) Sex, aggression and impulse control: An integrative account. *Neurocase* 14:93–121.
22. Joseph JE, Liu X, Jiang Y, Lynam D, Kelly TH (2009) Neural correlates of emotional reactivity in sensation seeking. *Psychol Sci* 20:215–223.
23. Riccardi P, et al. (2006) Sex differences in amphetamine-induced displacement of [(18)F]fallypride in striatal and extrastriatal regions: A PET study. *Am J Psychiatry* 163:1639–1641.
24. Conners CK, Sitarenios G, Parker JD, Epstein JN (1998) The revised Conners' Parent Rating Scale (CPRS-R): Factor structure, reliability, and criterion validity. *J Abnorm Child Psychol* 26:257–268.
25. MacDonald AW, 3rd, Cohen JD, Stenger VA, Carter CS (2000) Dissociating the role of the dorsolateral prefrontal and anterior cingulate cortex in cognitive control. *Science* 288:1835–1838.
26. Boes AD, et al. (2009) Right ventromedial prefrontal cortex: A neuroanatomical correlate of impulse control in boys. *Soc Cogn Affect Neurosci* 4:1–9.
27. Matsuo K, et al. (2009) A voxel-based morphometry study of frontal gray matter correlates of impulsivity. *Hum Brain Mapp* 30:1188–1195.
28. Brown SM, Manuck SB, Flory JD, Hariri AR (2006) Neural basis of individual differences in impulsivity: Contributions of corticolimbic circuits for behavioral arousal and control. *Emotion* 6:239–245.
29. Rubia K, et al. (2006) Progressive increase of frontostriatal brain activation from childhood to adulthood during event-related tasks of cognitive control. *Hum Brain Mapp* 27:973–993.
30. Christakou A, et al. (2009) Sex-dependent age modulation of frontostriatal and temporo-parietal activation during cognitive control. *Neuroimage* 48:223–236.
31. Becker JB (2009) Sexual differentiation of motivation: A novel mechanism? *Horm Behav* 55:646–654.
32. Diekhof EK, Gruber O (2010) When desire collides with reason: functional interactions between anteroventral prefrontal cortex and nucleus accumbens underlie the human ability to resist impulsive desires. *J Neurosci* 30:1488–1493.
33. Spreckelmeyer KN, et al. (2009) Anticipation of monetary and social reward differently activates mesolimbic brain structures in men and women. *Soc Cogn Affect Neurosci* 4:158–165.
34. Archer J (2009) Does sexual selection explain human sex differences in aggression? *Behav Brain Sci* 32:249–266.
35. Strenziok M, et al. (2009) Developmental effects of aggressive behavior in male adolescents assessed with structural and functional brain imaging. *Soc Cogn Affect Neurosci*, in press.
36. Lotze M, Veit R, Anders S, Birbaumer N (2007) Evidence for a different role of the ventral and dorsal medial prefrontal cortex for social reactive aggression: An interactive fMRI study. *Neuroimage* 34:470–478.

**Table S2. Participant characteristics**

| Characteristic                              | Group      |            | Difference |
|---------------------------------------------|------------|------------|------------|
|                                             | Male       | Female     |            |
| No. of individuals                          | 153        | 131        |            |
| Handedness, no.                             |            |            | NS         |
| L                                           | 21         | 18         |            |
| R                                           | 132        | 113        |            |
| Race, no.                                   |            |            | NS         |
| White                                       | 138        | 107        |            |
| Black                                       | 7          | 12         |            |
| Asian                                       | 4          | 3          |            |
| Hispanic                                    | 2          | 7          |            |
| Other                                       | 2          | 2          |            |
| IQ, mean (SD)                               | 113 (10.8) | 111 (11.6) | NS         |
| SES                                         | 42 (19.5)  | 43 (18.9)  | NS         |
| Total no. of scans                          | 363        | 278        |            |
| Number of people by number of scans         |            |            |            |
| 1 scan                                      | 47         | 40         |            |
| 2 scans                                     | 36         | 50         |            |
| ≥3 scans                                    | 70         | 41         |            |
| Mean age at each scan, y (SD)               |            |            |            |
| First scan                                  | 12.4 (2.7) | 12.5 (3.0) | NS         |
| Second scan                                 | 15.0 (2.5) | 14.8 (2.8) | NS         |
| Third scan                                  | 17.3 (2.5) | 17.0 (2.5) | NS         |
| Fourth scan                                 | 18.7 (2.0) | 18.3 (1.8) | NS         |
| Age distribution of scans, y                |            |            |            |
| Mean (SD)                                   | 14.6 (3.5) | 14.3 (3.5) |            |
| Range                                       | 9.0–22.8   | 9.0–22.8   |            |
| Genotype, no. individuals (no. of scans)    |            |            |            |
| AR-H                                        | 83 (192)   | 31 (66)    |            |
| AR-M                                        | —          | 69 (152)   |            |
| AR-L                                        | 70 (171)   | 31 (60)    |            |
| Test for difference between genotype groups |            |            |            |
| Handedness                                  | NS         | NS         |            |
| Race                                        | NS         | NS         |            |
| IQ                                          | NS         | NS         |            |
| SES                                         | NS         | NS         |            |
| Age at each scan                            |            |            |            |
| First scan                                  | NS         | NS         |            |
| Second scan                                 | NS         | NS         |            |
| Third scan                                  | NS         | NS         |            |

NS, not statistically significant; SES, socioeconomic status.

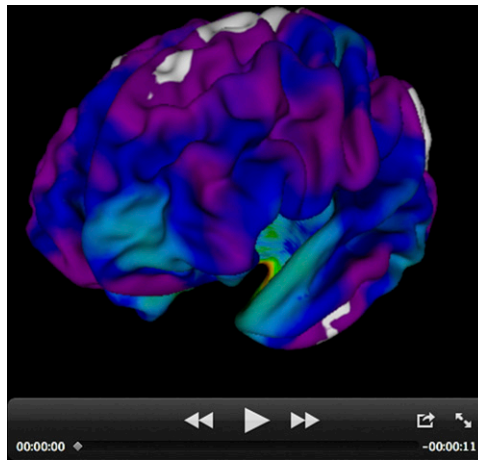

**Movie S1.** Time-lapse sequences show how spatial distribution of greater cortical thickness in males compared with females changes between ages 9 and 22 y for anterior-oblique left views of the cortical surface. Colored regions indicate a larger estimated mean group cortical thickness in male compared with female subjects. Color variation represents variation in the absolute magnitude of estimated difference in sex-group average cortical thickness. The transition from purple to dark blue to light blue to green to yellow to red represents grades of sex-group cortical thickness difference ranging from just above 0 mm to 0.5 mm greater cortical thickness in male than female subjects. White regions are where cortical thickness is greater in female than male subjects. At age 9 y, cortical thickness is greater in males than females over most of the cortex with the exception of small regions in bilateral supplementary motor (SMot) and inferior temporal (ITG) gyri, and right dorsolateral prefrontal (DLPF) regions. Then, as adolescence advances, frontal cortical thickness differences are lost in a bilateral wave that starts in posteriodorsal superior frontal gyrus and spreads in an anteroventral direction. This is driven by (i) cortical thinning with age in both male and female subjects, (ii) this occurring more rapidly in males, (iii) regional differences within the frontal lobe in the magnitude and sex difference in cortical thickness at age 9 y, and (iv) regional differences within the frontal lobe in the magnitude of sex difference in the rate of cortical thickness loss with age (Fig. 1 and Fig. S1). There is a striking similarity between these movies and those we previously published detailing the order at which frontal regions structurally mature relative to each other (<http://www.pnas.org/content/suppl/2004/05/13/0402680101.DC1/02680Movie2.mpg>). Therefore, the last regions in the frontal lobe to structurally mature are also the last where cortical thickness in males catches up with that in females. In contrast, beyond the frontal lobes, cortical thickness differences between male and female subjects generally increase over adolescence (with the exception of bilateral precuneus, superiodorsal parietal, and fusiform cortices). Divergence in cortical thickness between sex groups is most prominent in the temporal poles bilaterally.

[Movie S1](#)

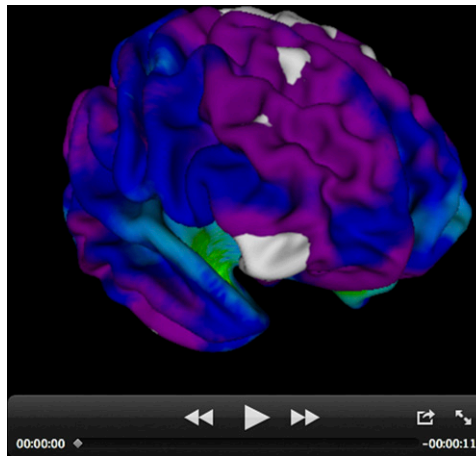

**Movie S2.** Time-lapse sequences show how spatial distribution of greater cortical thickness in males compared with females changes between ages 9 and 22 y for anterior-oblique right views of the cortical surface. Colored regions indicate a larger estimated mean group cortical thickness in male compared with female subjects. Color variation represents variation in the absolute magnitude of estimated difference in sex-group average cortical thickness. The transition from purple to dark blue to light blue to green to yellow to red represents grades of sex-group cortical thickness difference ranging from just above 0 mm to 0.5 mm greater cortical thickness in male than female subjects. White regions are where cortical thickness is greater in female than male subjects. At age 9 y, cortical thickness is greater in males than females over most of the cortex with the exception of small regions in bilateral supplementary motor (SMot) and inferior temporal (ITG) gyri, and right dorsolateral prefrontal (DLPF) regions. Then, as adolescence advances, frontal cortical thickness differences are lost in a bilateral wave that starts in posteriodorsal superior frontal gyrus and spreads in an anteroventral direction. This is driven by (i) cortical thinning with age in both male and female subjects, (ii) this occurring more rapidly in males, (iii) regional differences within the frontal lobe in the magnitude and sex difference in cortical thickness at age 9 y, and (iv) regional differences within the frontal lobe in the magnitude of sex difference in the rate of cortical thickness loss with age (Fig. 1 and Fig. S1). There is a striking similarity between these movies and those we previously published detailing the order at which frontal regions structurally mature relative to each other (<http://www.pnas.org/content/suppl/2004/05/13/0402680101.DC1/02680Movie2.mpg>). Therefore, the last regions in the frontal lobe to structurally mature are also the last where cortical thickness in males catches up with that in females. In contrast, beyond the frontal lobes, cortical thickness differences between male and female subjects generally increase over adolescence (with the exception of bilateral precuneus, superiodorsal parietal, and fusiform cortices). Divergence in cortical thickness between sex groups is most prominent in the temporal poles bilaterally.

[Movie S2](#)
